# Supplementary material
Source: PubMed Central journal article supplement (PMC3982393)

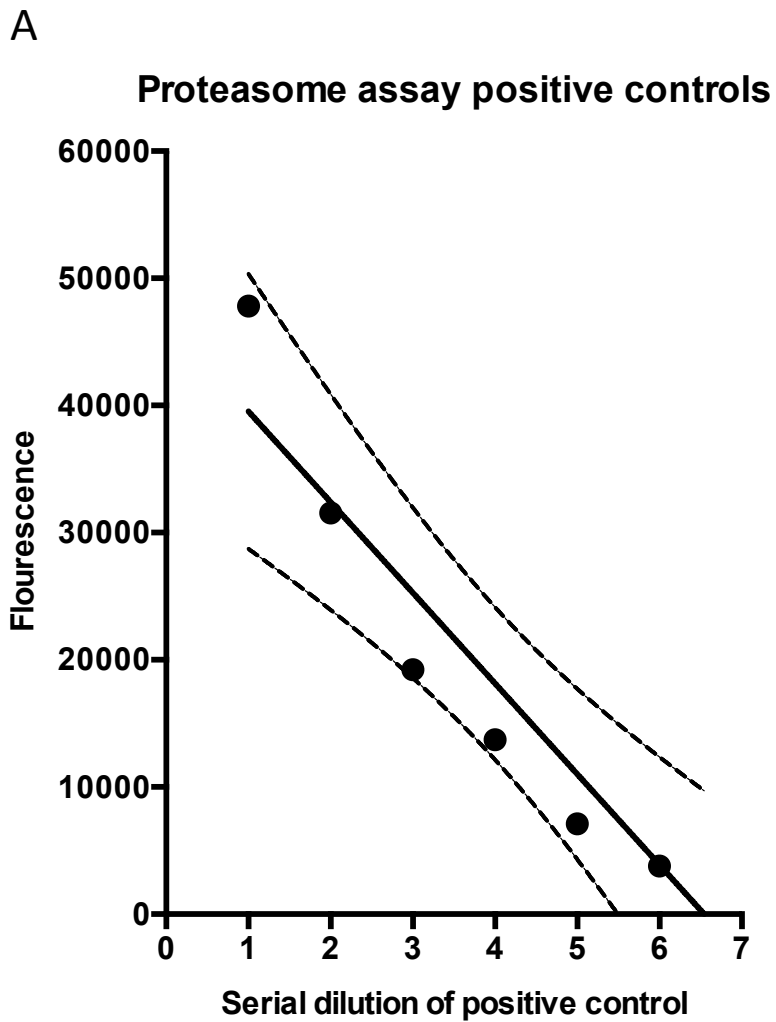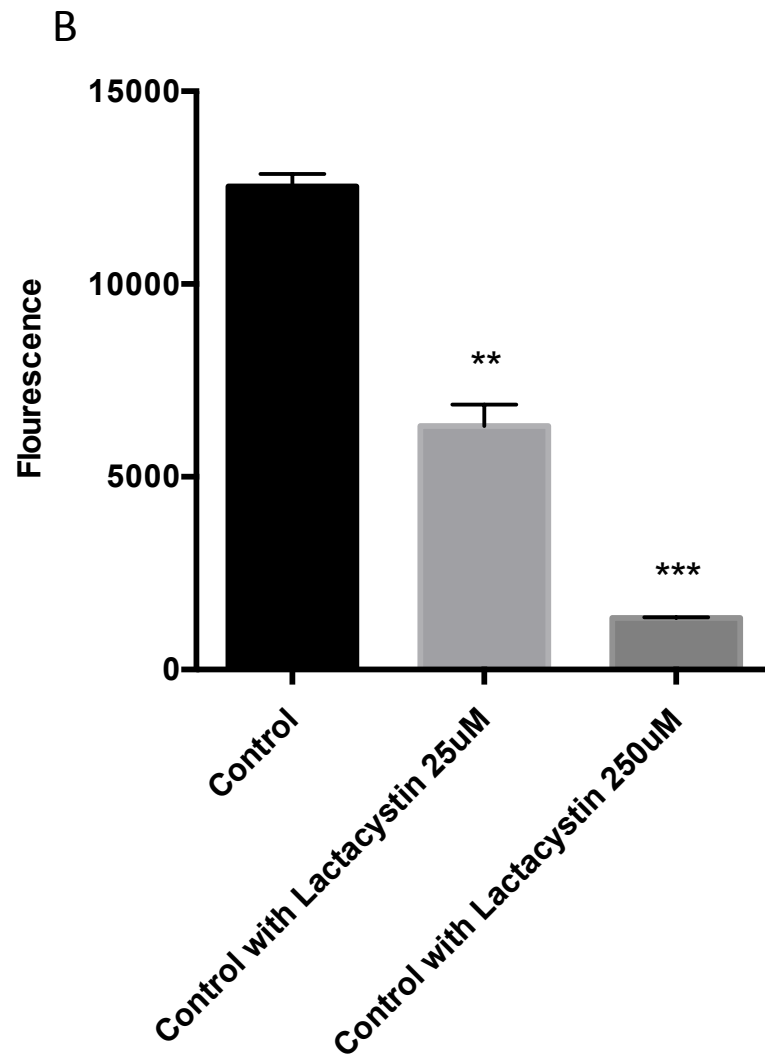

Supplementary figure 2

Supplement: NIHMS568052-supplement-Supp_Fig_2.pdf [file NIHMS568052-supplement-Supp_Fig_2.pdf]
